# Supplementary material for: Lipidomics-Based Comparison of Molecular Compositions of Green, Yellow, and Red Bell Peppers
Source: MDPI journal article supplement (doi:10.3390/metabo11040241), 2021-04-14
Supplement: s1 [file s1]

## Supplemental Methods: Compound annotation

Processed data was reimported into MPP for annotation using Agilent MassHunter ID Browser B.08 (ID Browser) to search in-house and commercial databases. The in-house database comprises Human Metabolome Database (HMDB) 4.0 [1], Lipid Maps [2], National Institute of Science and Technology (NIST) [3], and 638 authentic standards with MS/MS data. Annotations were based on accurate mass, with a mass error cutoff of 10 ppm, isotope ratios and isotopic distribution whereby the predicted isotope distribution is compared to actual ion height and a score is generated. Scores  $\geq 50$  were considered putative annotations and correspond to a Metabolomics Standards Initiative (MSI) metabolite identification level two or three [4]. In metabolomics, MSI level two is defined as compounds that have been annotated based on physiochemical properties or through matching to MS/MS spectral libraries. MSI level one is the highest form of annotation and requires matching LC/MS/MS data to authentic reference standards. In addition, unmatched data for significant compounds was manually searched using FoodDB [5], PubChem [6], and KNApSACK [7]. For compounds in which no annotation was possible, the molecular formula generator in ID Browser was used to estimate a metabolite chemical formula. All data and annotations were also manually reviewed.

To improve confidence in annotations, tandem MS analysis (MS/MS) was performed by targeting m/z and RT of compounds of interest in pepper samples. Lipid extracts were run using the same LC-MS method as original samples (see main text for details) with MS/MS data collected at fixed 10, 20, and 40eV collision energies. Resulting experimental MS/MS spectra were compared in National Institute of Science and Technology (NIST) Tandem Mass Spectral Library (Version 2.3) [8, 9] using the NIST14 and NIST17 MSMS spectral libraries. One molecule of interest was initially annotated as  $\beta$ -cryptoxanthin following searching of commercial and in-house databases. Subsequent tandem mass spectrometry of pepper samples for the molecule confirmed this annotation with a 552 m/z and

matching to the NIST17 standard mass spectra library; match factor value for  $\beta$ -cryptoxanthin was 762 and the reverse match factor value was 887 (Supplementary Methods Figure 1).

Supplemental Figure 1A.

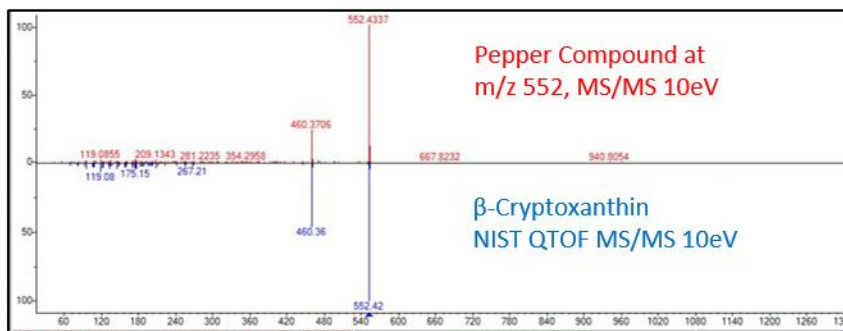

Supplemental Figure 1B.

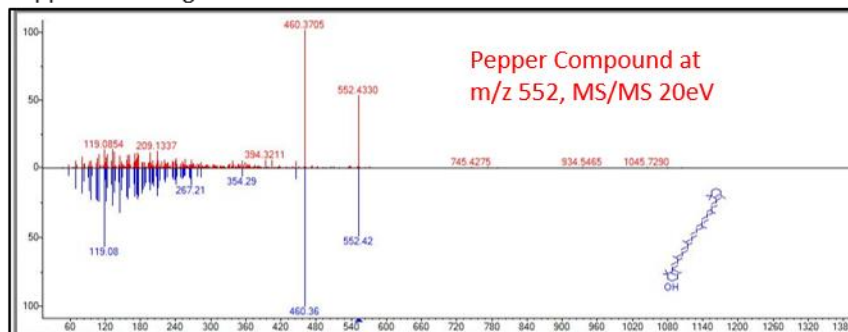

Supplemental Figure 1C.

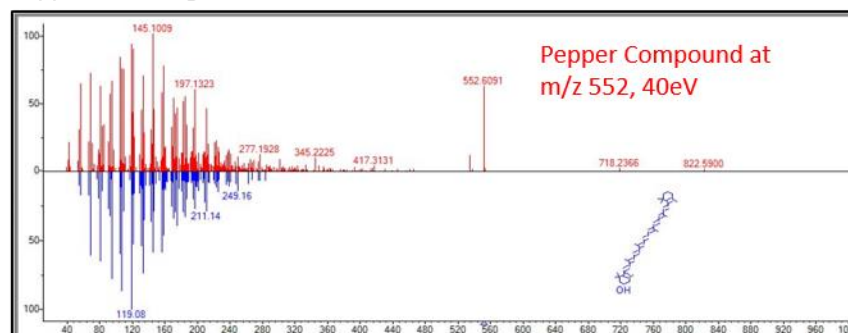

**Supplemental Methods Figure 1: MS/MS of compound initially annotated as  $\beta$ -cryptoxanthin.** Figure shows NIST17 MS/MS Difference results spectra for pepper compound at m/z 552 using collision energies at 10eV (S1A), 20eV (S1B), and 40eV (S1C) matched to  $\beta$ -cryptoxanthin from the NIST QTOF spectral library. The top spectra (red) is the experimental pepper compound MS/MS spectra, the bottom spectra (blue) is from the NIST QTOF spectral fragments.

While this confirmed the annotation, additional review showed that  $\beta$ -cryptoxanthin is indistinguishable from  $\alpha$ -cryptoxanthin, both of which are 552 m/z and have identical MS/MS spectra. Authentic standards of  $\beta$ -cryptoxanthin and  $\alpha$ -cryptoxanthin were purchased, analyzed using liquid chromatography along with drift tube ion mobility mass spectrometry (Agilent 6560 IMMS-QTOF, Santa Clara, CA) to determine if the  $\alpha$  and  $\beta$  isoforms could be resolved. While the  $\alpha$  and  $\beta$  isoforms had slightly different retention times, they had the same drift time (Supplemental Methods Figure 2). These results are generally consistent with previous work [10], whereby separation of  $\alpha$  and  $\beta$  isoforms was achieved using a different HPLC method than was employed in the current study. Because  $\alpha$ -cryptoxanthin is rarely found in plants [10], it seemed most plausible that  $\beta$ -cryptoxanthin was present in peppers and we thus considered this the most likely annotation.

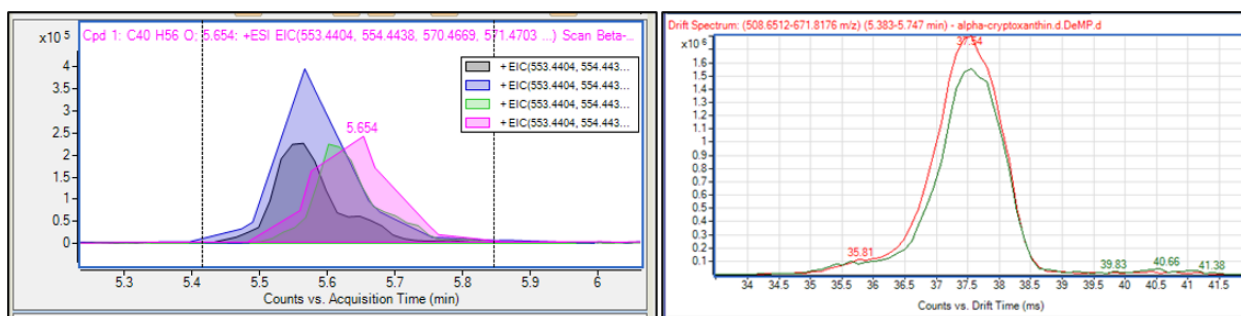

**Supplemental Methods Figure 2: Analysis of cryptoxanthin standards using ion mobility mass spectrometry.** **Left.** Extracted Ion Chromatogram (EIC) showing the  $\alpha$  form of cryptoxanthin in Purple and Gray, and the  $\beta$  form in Green and Pink. **Right.** Drift Spectrum showing the  $\alpha$  form in Red and the  $\beta$  form in Black.

Tandem MS/MS data was also acquired for remaining compounds of interest (Table 1, Main Text); however, usable data was only obtained for 4 additional compounds. All MS/MS data was searched using the NIST17 spectral libraries but no spectral matches were observed. The data was then searched using the in silico MS/MS spectral interpretation software SIRIUS version 4.6.0 [11] for formula and CSI:FingerID version 1.4.8 [12] for compound annotation.

To increase confidence in compound ID database searches, pepper compounds were limited to the following natural product databases: Collection of Open Natural Products (COCONUT) [13], Global Natural Products Social Molecular Networking (GNPS) [14] , Plant Metabolic Network (PMN) [15], KNApSack [7], and SUPER NATURAL II [16].

In these cases, the MS/MS data did not match the original database search results and additional interpretation was required. Annotations in the main text indicate the best matches following MS, MS/MS, in silico searches and overall likelihood of a compound being present in plants/peppers.

Alternate names are listed in Supplemental Methods Tables 1 and 2.

**Supplemental Methods Table 1:** Alternate compound names based on MS and/or tandem MS

| <b>Reported Annotation</b>                                              | <b>Reported based on</b>                | <b>Alternative Annotations</b> |
|-------------------------------------------------------------------------|-----------------------------------------|--------------------------------|
| Beta-cryptoxanthin                                                      | MS and MS/MS                            | Alpha-cryptoxanthin            |
| 2-ethenyl-2,4b,8,8-tetramethyl-tetradecahydrophenanthrene-3,5,10a-triol | MS/MS                                   | Original annotation was PGF2   |
| Fargesin                                                                | MS and likelihood of presence in sample | Lansiumarin B                  |
| Ascorbyl linoleate                                                      | MS and likelihood of presence in sample | Fusicoplagin A, Agaric acid    |
| Sucrose acetate isobutyrate                                             | MS                                      | No alternative hits            |
| Ivermectin B1b                                                          | MS                                      | No alternative hits            |
| Glycidyl oleate                                                         | MS                                      | No alternative hits            |
| Goyaglycoside g                                                         | MS                                      | No alternative hits            |
| Ramipril                                                                | MS                                      | No alternative hits            |
| all-trans-retinyl oleate                                                | MS                                      | No alternative hits            |
| Archaeatidylglycerol-myo-inositol                                       | MS                                      | No alternative hits            |

**Supplemental Methods Table 2:** Alternate compound names based on in silico analysis

| Original MPP Annotations |          |                                                                     |                     |                |               | SIRIUS RESULTS                                                          |            |          |           |         |                   |            |              |                          |
|--------------------------|----------|---------------------------------------------------------------------|---------------------|----------------|---------------|-------------------------------------------------------------------------|------------|----------|-----------|---------|-------------------|------------|--------------|--------------------------|
| Compound                 | Mass     | MS1 Composite Spectrum                                              | Ion Species         | Retention Time | Formula       | Name                                                                    | Formula    | m/z      | ppm Error | Adduct  | # Explained Peaks | Tree Score | Fragment TIC | Database Sources         |
| PGF2alpha-d4             | 318.2748 | ( <u>341.2646</u> , 8505.0)(342.264, 1318.15)                       | [M+Na] <sup>+</sup> | 1.324          | C20 H30 D4 O5 | 2-ethenyl-2,4b,8,8-tetramethyl-tetradecahydrophenanthrene-3,5,10a-triol | C20 H34 O3 | 341.2687 | 4.33      | M+H-H2O | 10/30             | 41.89      | 28.62%       | COCONUT, SuperNatural II |
| Fusicoplugin A           | 438.2597 | ( <u>439.27</u> , 116694.81)(440.2731, 28633.93)(441.2783, 6081.88) | [M+H] <sup>+</sup>  | 7.403          | C24 H38 O7    | Agaric acid                                                             | C22 H40 O7 | 439.2682 | 3.54      | M+Na    | 30/15             | 88.18      | 75.53%       | COCONUT, SuperNatural II |

## References

1. Wishart, D.S., et al., *HMDB 4.0: the human metabolome database for 2018*. Nucleic Acids Res, 2018. **46**(D1): p. D608-D617.
2. O'Donnell, V.B., et al., *LIPID MAPS: Serving the next generation of lipid researchers with tools, resources, data, and training*. Sci Signal, 2019. **12**(563).
3. Choquette, S.J., D.L. Duewer, and K.E. Sharpless, *NIST Reference Materials: Utility and Future*. Annu Rev Anal Chem (Palo Alto Calif), 2020. **13**(1): p. 453-474.
4. Sumner, L.W., et al., *Proposed minimum reporting standards for chemical analysis Chemical Analysis Working Group (CAWG) Metabolomics Standards Initiative (MSI)*. Metabolomics, 2007. **3**(3): p. 211-221.
5. Harrington, R.A., et al., *Nutrient composition databases in the age of big data: foodDB, a comprehensive, real-time database infrastructure*. BMJ Open, 2019. **9**(6): p. e026652.
6. Wang, Y., et al., *PubChem BioAssay: 2017 update*. Nucleic Acids Res, 2017. **45**(D1): p. D955-D963.
7. Afendi, F.M., et al., *KNAPSAck family databases: integrated metabolite-plant species databases for multifaceted plant research*. Plant Cell Physiol, 2012. **53**(2): p. e1.
8. Stein, S.E., *Estimating probabilities of correct identification from results of mass spectral library searches*. J Am Soc Mass Spectrom, 1994. **5**(4): p. 316-23.
9. Technology, N.I.o.S.a. *NIH Mass Spectral Library with Search Program (Data Version: NIST 14, Software Version 2.2)*. 2014; Available from: <http://www.nist.gov/srd/nist1a.cfm>.
10. de Azevedo-Meleiro, C.H. and D.B. Rodriguez-Amaya, *Qualitative and quantitative differences in the carotenoid composition of yellow and red peppers determined by HPLC-DAD-MS*. J Sep Sci, 2009. **32**(21): p. 3652-8.
11. Duhrkop, K., et al., *SIRIUS 4: a rapid tool for turning tandem mass spectra into metabolite structure information*. Nat Methods, 2019. **16**(4): p. 299-302.
12. Duhrkop, K., et al., *Searching molecular structure databases with tandem mass spectra using CSI:FingerID*. Proc Natl Acad Sci U S A, 2015. **112**(41): p. 12580-5.
13. Sorokina, M., et al., *COCONUT online: Collection of Open Natural Products database*. J Cheminform, 2021. **13**(1): p. 2.
14. Wang, M., et al., *Sharing and community curation of mass spectrometry data with Global Natural Products Social Molecular Networking*. Nat Biotechnol, 2016. **34**(8): p. 828-837.
15. Dreher, K., *Putting The Plant Metabolic Network pathway databases to work: going offline to gain new capabilities*. Methods Mol Biol, 2014. **1083**: p. 151-71.
16. Banerjee, P., et al., *Super Natural II--a database of natural products*. Nucleic Acids Res, 2015. **43**(Database issue): p. D935-9.
